# Supplementary material
Source: PubMed Central journal article supplement (PMC2880868)

**Table 1. Rapamycin does not decrease the half-life of RTP801.** Neuronal PC12 cells were exposed to rapamycin for 1 hr where indicated and then to MPP+ for 8 hr where indicated. The half-life of RTP801 was determined under each condition as determined in Materials and Methods. n = number of cultures evaluated. r = regression coefficient.

| <b>TREATMENT</b> | <b>T1/2(min)</b> | <b>n</b> | <b>r</b> |
|------------------|------------------|----------|----------|
| CONTROL          | 5.1              | 6        | 0.92     |
| RAPA             | 10.6             | 2        | 0.99     |
| MPP+             | 7.4              | 5        | 0.96     |
| RAPA+MPP+        | 9.6              | 5        | 0.96     |

**SUPPLEMENTAL FIGURE 1. Rapamycin does not protect from exogenous RTP801 expression.** Neuronal PC12 cells were transfected with empty vector pCMS-eGFP or pCMS-eGFP-RTP801. Immediately after transfection, cultures were treated with or without 20 nM or 1  $\mu$ M rapamycin. Viability of transfected cells was scored under fluorescence microscopy 48 hours later. Values represent mean  $\pm$  SEM of at least three independent experiments in triplicate in each condition.

**SUPPLEMENTAL FIGURE 2. Effects of rapamycin on Akt phosphorylation in the MPTP-injected mouse model.**

Mice were injected with either vehicle, rapamycin, MPTP or rapamycin + MPTP, as described in Methods for the acute regimen, and sacrificed after 24 hours. Ventral midbrains were dissected, homogenized in lysis buffer and the homogenates subjected to SDS-PAGE and Western immunoblotting. Membranes were probed with Phospho-Thr308-Akt and Phospho-Ser473-Akt antibodies and reprobed with antibodies for total Akt and ERK1/2 as loading controls. Films resulting from the immunoblot were scanned and relative densities of Phospho-Akt bands were normalized in each case to the densities of the corresponding total Akt signals. Values (in arbitrary units) for Phospho-Ser473 and Phospho-Thr308 Akt are expressed as means  $\pm$  SEM for at least three mice per condition. \*\*p<0.01 vs mice injected with MPTP.

**SUPPLEMENTAL FIGURE 3. Numbers of TH-negative, Nissl-positive neurons in the SNpc of mice treated with vehicle, rapamycin, MPTP or rapamycin + MPTP.** Mice subjected to the acute regimen as described in the text were sacrificed 7 days after the last MPTP injection. Midbrains were cryosectioned, immunostained with tyrosine hydroxylase antibody and subjected to Nissl staining with cresyl violet. Unbiased stereology was used to determine the total numbers of TH-negative, Nissl-positive neurons in the substantia nigra pars compacta. There were no statistically significant differences between the various conditions.

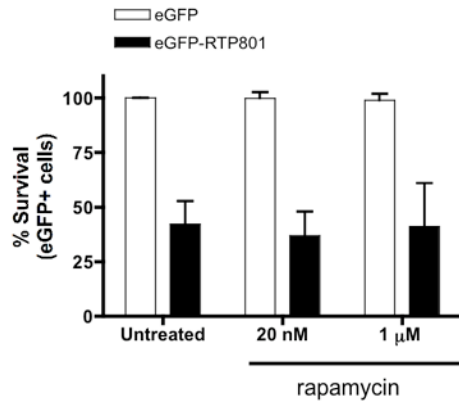

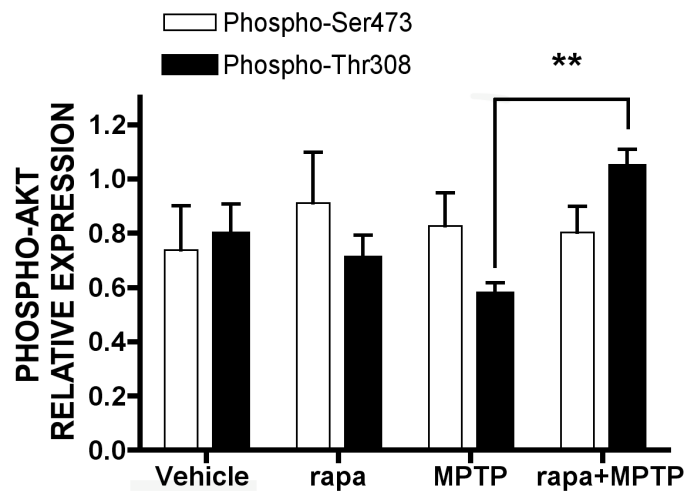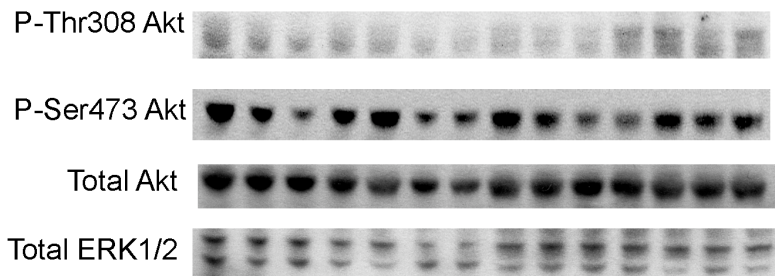

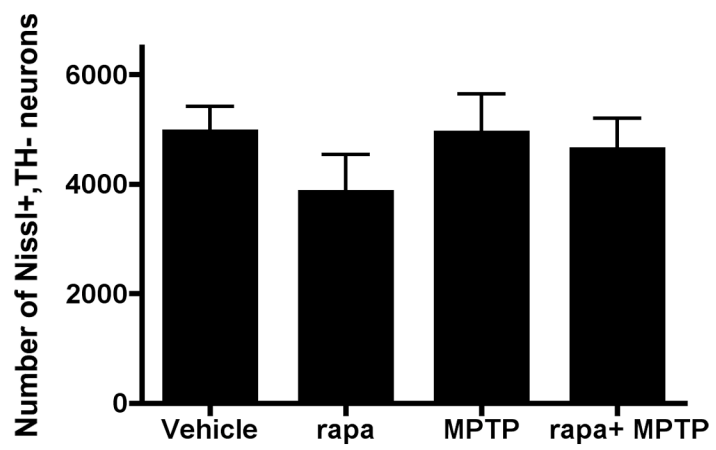

Supplement: NIHMS172675-supplement-Supp1.pdf [file NIHMS172675-supplement-Supp1.pdf]
